# Supplementary material for: Anemia risk in relation to lead exposure in lead-related manufacturing
Source: BMC Public Health. 2017 May 5;17:389. doi: 10.1186/s12889-017-4315-7 (PMC5420139; doi:10.1186/s12889-017-4315-7)
Supplement: Supplementary file 1 — Summary of the Benchmark dose (BMD) models used in this study. (DOCX 32 kb) [file 12889_2017_4315_MOESM1_ESM.docx]

**Table S1**

Summary of the Benchmark dose (BMD) models used in this study

| Model | Risk function, *R*(*d*) |  | Constraints |
| --- | --- | --- | --- |
| Dichotomous Hill |  | (T1) | 0 ≤ *g* < 1, 0 < *v* ≤ 1, *β* ≥ 0 |
| Gamma |  | (T2) | *α* ≥ 0, *β* > 0, 0 ≤ *γ* < 1 |
| Logistic |  | (T3) | *β* > 0 |
| Loglogistic |  | (T4) | 0 ≤ *γ* < 1, *β* > 0 |
| Logprobit |  | (T5) | 0 ≤ *γ* < 1, *β* > 0 |
| Multistage |  | (T6) | 0 ≤ *γ* < 1, *β*j ≥ 0 |
| Probit |  | (T7) | *β* > 0 |
| Quantal-linear |  | (T8) | *β* ≥ 0 |
| Weibull |  | (T9) | *α* ≥ 0, *β* > 0 |

Parameter meanings: *d* is the dose; *α* is the power; *β*0 is the intercept; *β*1 is the slope; γ is the background; *v* is the maximum probability of response predicted by the dichotomous Hill model; *g* multiplied by *v* is the background probability of response.
